# Supplementary material for: Akebia trifoliata pericarp extract ameliorates inflammation through NF-κB/MAPK signaling pathways and modifies gut microbiota
Source: Royal Society of Chemistry journal article supplement (doi:10.1039/c9fo02917f), 2020-01-01
Supplement: c9fo02917f1.pdf [file c9fo02917f1.pdf]

### **Supporting information**

**Figure 1** - Effect of APE on the viability of RAW264.7 cells determined by MTT. The results are expressed as the mean  $\pm$  SD; Different letters indicate statistical difference ( $p < 0.05$ , Duncan's test).

**Table 1** - Sequences of primers used for RT-qPCR.

**Figure 1**

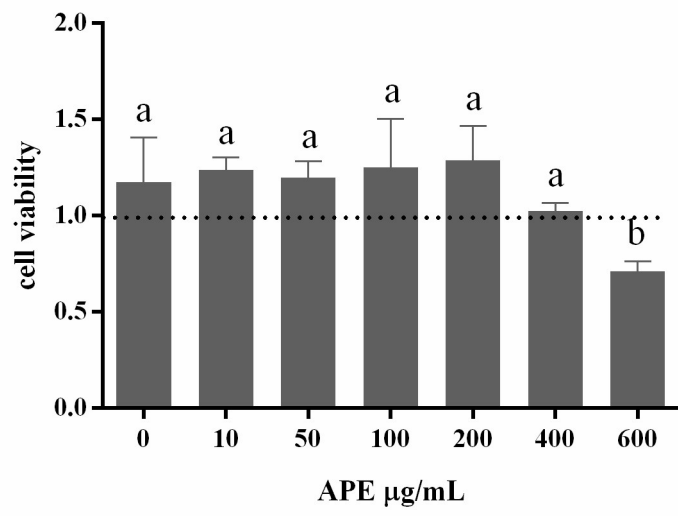

**Table 1**

| Primer name    | Forward (5'-3')                | Reverse (5'-3')             | size |
|----------------|--------------------------------|-----------------------------|------|
| COX-2          | GGT GCC TGG TCT GAT G          | CTG CTG TGG AAT AGT TGC     | 117  |
| iNOS           | CCT CAC GCT TGG GTC TTG TT     | GCA CAA GGG GTT TTC TTC ACG | 198  |
| IL-1 $\beta$   | TTG AAG TTG ACG GAC CCC AA     | ATA CTG CCT GCC TGA AGC TC  | 126  |
| IL-6           | GAG ACT TCC ATC CAG TTG CCT    | TGG GAG TGG TAT CCT CTG TGA | 105  |
| TNF- $\alpha$  | TGT CTA CTC CTC AGA GCC CC     | TGA GTC CTT GAT GGT GGT GC  | 166  |
| $\beta$ -actin | GTG CTA TGT TGC TCT AGA CTT CG | ATG CCA CAG GAT TCC ATA CC  | 174  |
